# Supplementary material for: Cation-exchanged zeolites for the selective oxidation of methane to methanol
Source: Royal Society of Chemistry journal article supplement (doi:10.1039/c7cy01229b), 2017-10-19
Supplement: c7cy01229b1.pdf [file c7cy01229b1.pdf]

**Supporting Information**  
**for**  
**Cation-Exchanged Zeolites for the Selective Oxidation of Methane to**  
**Methanol**

Ambarish R. Kulkarni,<sup>a,b,\*</sup> Zhi-Jian Zhao,<sup>a,b,c</sup> Samira Siahrostami,<sup>a,b</sup> Jens K. Nørskov,<sup>a,b</sup> Felix  
Studt<sup>d,e\*</sup>

<sup>a</sup> SUNCAT Center for Interface Science and Catalysis, Department of Chemical Engineering, Stanford University,  
450 Serra Mall Stanford, California 94305, USA

<sup>b</sup> SUNCAT Center for Interface Science and Catalysis, SLAC National Accelerator Laboratory, Menlo Park,  
California 94025, United States

<sup>c</sup> Key Laboratory for Green Chemical Technology of Ministry of Education, Collaborative Innovation Center of  
Chemical Science and Engineering, School of Chemical Engineering and Technology, Tianjin University, Tianjin  
300072, People's Republic of China

<sup>d</sup> Institute of Catalysis Research and Technology, Karlsruhe Institute of Technology, Hermann-von-Helmholtz-Platz  
1, 76344 Eggenstein-Leopoldshafen, Germany

<sup>e</sup> Institute for Chemical Technology and Polymer Chemistry, Karlsruhe Institute of Technology, Engesserstr. 18, 76131  
Karlsruhe, Germany

E-mail: [felix.studt@kit.edu](mailto:felix.studt@kit.edu), [ambarish@stanford.edu](mailto:ambarish@stanford.edu).

**KEYWORDS:** Partial methane oxidation, Density Functional Theory, zeolites

**Table S1.** Table showing the improvements in productivity (in mol-methanol/mol-Cu) of Cu-exchanged zeolites from 2005 to 2017, used in Table 1.

| Date      | Zeolite | Oxidant          | Productivity | Si/Al    | Comments                                                                                                          | Ref |
|-----------|---------|------------------|--------------|----------|-------------------------------------------------------------------------------------------------------------------|-----|
| 15-Jan-05 | MFI     | O <sub>2</sub>   | 0.020        | 12       | First report claiming bis( $\mu$ -oxo)dicopper as the active site. UV-vis band at 22,700 cm <sup>-1</sup>         | 1   |
|           | MOR     | O <sub>2</sub>   | 0.020        | 8.8      |                                                                                                                   |     |
|           | FAU     | O <sub>2</sub>   | 0.005        | 2.7      |                                                                                                                   |     |
| 26-Oct-05 | MOR     | O <sub>2</sub>   | 0.007        | 8.8      | UV-vis band at 22,000 cm <sup>-1</sup> for MOR. EMT, FAU, FER and BEA at inactive at lower reaction temperatures. | 2   |
|           | EMT     | O <sub>2</sub>   | 0.001        | 4        |                                                                                                                   |     |
|           | FAU     | O <sub>2</sub>   | 0.007        | 2.7 – 37 |                                                                                                                   |     |
|           | FER     | O <sub>2</sub>   | 0.001        | 6.2      | Higher reaction temperature gives better productivity                                                             |     |
|           | BEA     | O <sub>2</sub>   | 0.002        | 9.8      |                                                                                                                   |     |
|           | MFI     | O <sub>2</sub>   | 0.012        | 12       |                                                                                                                   |     |
|           | MOR     | O <sub>2</sub>   | 0.020        | 8.8      |                                                                                                                   |     |
|           | FER     | O <sub>2</sub>   | 0.013        | 6.2      |                                                                                                                   |     |
|           | BEA     | O <sub>2</sub>   | 0.006        | 9.8      |                                                                                                                   |     |
| 10-Nov-09 | MFI     | N <sub>2</sub> O | 0.021        | 12       | Active site identified as mono( $\mu$ -oxo)dicopper                                                               | 3   |
| 4-Jun-10  | MFI     | O <sub>2</sub>   | 0.006        | 17.5     | Polar and protic solvents for methanol extraction                                                                 | 4   |
| 11-Nov-11 | MOR     | O <sub>2</sub>   | 0.020        | 11       | Steam/ water saturated He for methanol extraction                                                                 | 5   |
| 7-Aug-14  | MFI     | NO               | 0.002        | 1.88     | NO as an oxidant                                                                                                  | 6   |
| 4-Feb-15  | CHA     | O <sub>2</sub>   | 0.060        | 6, 12    | Small 8MR zeolites shown to be active.                                                                            | 7   |
|           | SAPO-34 | O <sub>2</sub>   | 0.010        | 6        |                                                                                                                   |     |
|           | AFX     | O <sub>2</sub>   | 0.050        | 6.5      |                                                                                                                   |     |
|           | AEI     | O <sub>2</sub>   | 0.090        | 10       |                                                                                                                   |     |
|           | MOR     | O <sub>2</sub>   | 0.040        | 5        |                                                                                                                   |     |
|           | MFI     | O <sub>2</sub>   | 0.030        | 11.5     |                                                                                                                   |     |
| 25-Jun-15 | MOR     | O <sub>2</sub>   | 0.300        | 5.5 - 21 | Tri-copper active site                                                                                            | 8   |
| 8-Mar-16  | MOR     | O <sub>2</sub>   | 0.031        | 4.1      | Different synthesis techniques                                                                                    | 9   |
|           | MOR     | O <sub>2</sub>   | 0.047        | 3.1      |                                                                                                                   |     |
| 24-Mar-16 | MOR     | O <sub>2</sub>   | 0.139        | 4.7      | Low temperature, isothermal process. Dehydrated copper oxide clusters as the active site                          | 10  |
|           | MOR     | O <sub>2</sub>   | 0.076        | 4.7      |                                                                                                                   |     |
|           | MFI     | O <sub>2</sub>   | 0.040        | 2.8      |                                                                                                                   |     |
|           | FAU     | O <sub>2</sub>   | 0.009        | 7.6      |                                                                                                                   |     |
| 13-Jun-16 | MFI     | O <sub>2</sub>   | 0.090        | 13.2     | First report of a continuous process for methane activation                                                       | 11  |
|           | MFI     | O <sub>2</sub>   | 0.200        | 13.6     |                                                                                                                   |     |
| 1-Aug-16  | MFI     | O <sub>2</sub>   | 0.180        | 0 – 0.67 | Paired and isolated Al sites in MFI for tri-copper active sites                                                   | 12  |
|           | MFI     | O <sub>2</sub>   | 0.200        | 0 – 0.54 |                                                                                                                   |     |
| 21-Oct-16 | CHA     | N <sub>2</sub> O | 0.026        | 12       | Continuous process for methane activation in SSZ-13                                                               | 13  |
|           | CHA     | N <sub>2</sub> O | 0.060        | 12       |                                                                                                                   |     |
|           | CHA     | N <sub>2</sub> O | 0.071        | 12       |                                                                                                                   |     |
|           | CHA     | O <sub>2</sub>   | 0.018        | 12       |                                                                                                                   |     |
|           | CHA     | O <sub>2</sub>   | 0.038        | 12       |                                                                                                                   |     |
|           | CHA     | O <sub>2</sub>   | 0.091        | 12       |                                                                                                                   |     |
| 25-Dec-16 | MOR     | O <sub>2</sub>   | 0.230        | 11       | Effect of pH, co-cations                                                                                          | 14  |
| 3-Jan-17  | MOR     | O <sub>2</sub>   | 0.146        | 10       | Solid state ion-exchange vs. aqueous phase ion-exchange                                                           | 15  |
|           | MOR     | O <sub>2</sub>   | 0.063        | 10       |                                                                                                                   |     |
|           | MOR     | O <sub>2</sub>   | 0.224        | 10       |                                                                                                                   |     |
| 22-Mar-17 | MOR     | O <sub>2</sub>   | 0.220        | 20       | O <sub>2</sub> activation at very high temperatures                                                               | 16  |
|           | MOR     | N <sub>2</sub> O | 0.310        | 20       |                                                                                                                   |     |
| 4-May-17  | MOR     | H <sub>2</sub> O | 0.250        | 13       | Methane activation using H <sub>2</sub> O as an oxidant                                                           | 17  |
| 25-Sep-17 | CHA     | O <sub>2</sub>   | 0.202        | 12       | Systematic exploration of process parameters, [Cu-OH] <sup>+</sup> is the precursor to the active site in CHA     | 18  |

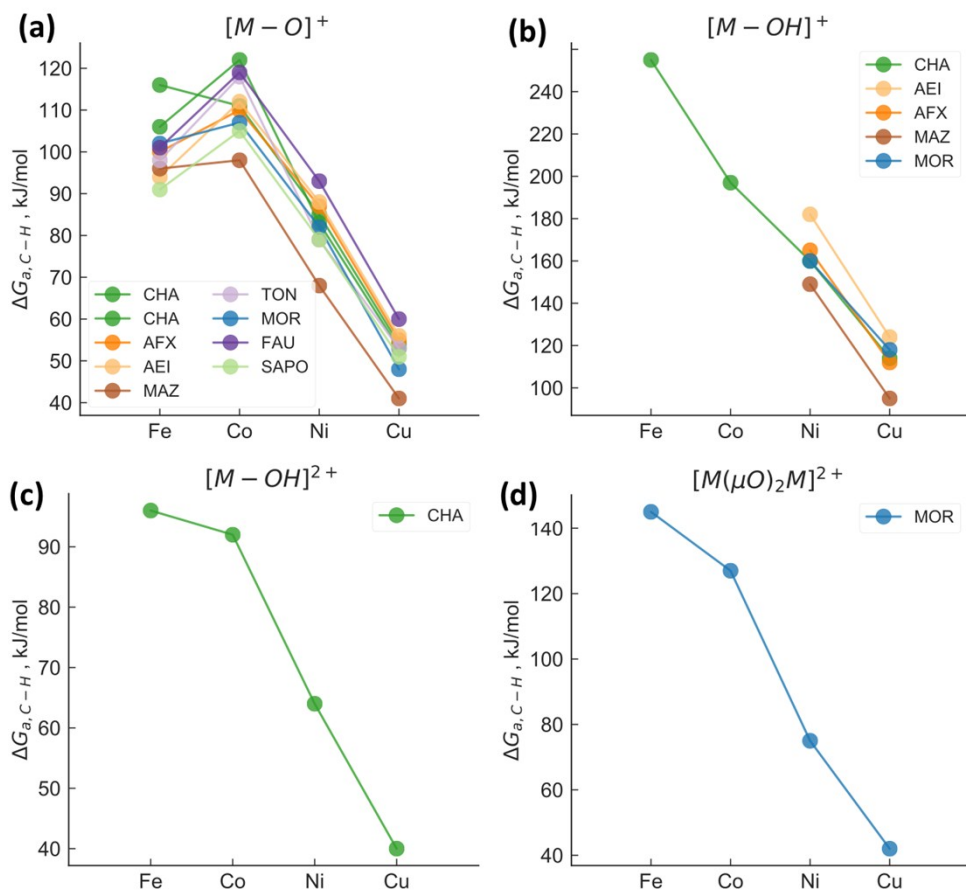

**Figure S1.** Effect of changing transition metal cation on the calculated methane activation barriers for (a)  $[M-O]^+$ , (b)  $[M-OH]^+$ , (c)  $[M-OH]^{2+}$  and (d)  $[M(\mu O)_2M]^{2+}$  motifs in different zeolites.

**Table S2.** Formation energy ( $\Delta E_{f,DFT}$ ) and transition state energy ( $\Delta E_{a,DFT}$ ) of  $[M-O]^+$  motif in CHA. In contrast to other cations, DFT predicts a low spin state configuration of  $[Fe-O]^+$  the TS. This results in  $[Fe-O]^+$  having a lower C-H activation barrier than  $[Co-O]^+$  as shown in Fig 3b.

| Cation  | $\Delta E_{f,DFT}$ (eV) | # unpaired electrons | $\Delta E_{a,DFT}$ (eV) |
|---------|-------------------------|----------------------|-------------------------|
| Fe_high | <u>-2.29</u>            | <u>3</u>             | <u>0.84</u>             |
| Fe_low  | -2.09                   | 5                    | 1.02                    |
| Co      | -1.74                   | 4                    | 0.79                    |
| Ni      | -0.95                   | 3                    | 0.52                    |
| Cu      | 0.09                    | 2                    | 0.20                    |

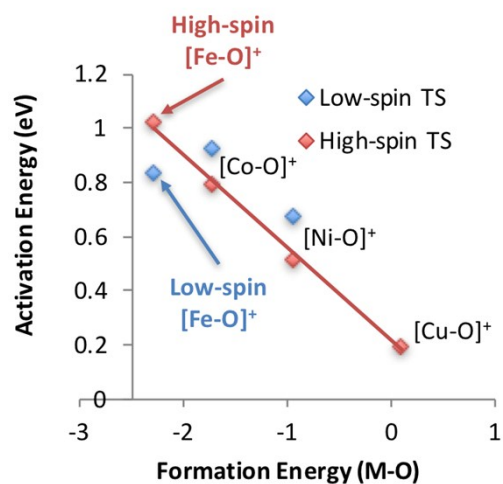

**Figure S2.** Scaling lines for the high-spin (red) and low-spin (blue) transition states for various  $[M-O]^+$  motifs in CHA. Activation energies are calculated relative to the most stable high (Co, Ni and Cu) or low (Fe) states for  $[M-O]^+$ .

**Table S3.** Transition state free energies and  $\angle Cu-O-Cu$  for  $[Cu-O-Cu]^{2+}$  motifs in CHA, MOR, FAU and MFI topologies.

| Framework Topology | Cu-O-Cu angle | $\Delta G_{a,C-H}$ (kJ/mol) |
|--------------------|---------------|-----------------------------|
| CHA                | 115°          | 94                          |
| MOR                | 135°          | 104                         |
| FAU                | 126°          | 105                         |
| MFI                | 135.8°        | 98                          |

**Table S4.** Bader charges of the active oxygen atoms for various Cu-motifs in MOR.

| Motif/MOR                      | $q_{bader}$        |
|--------------------------------|--------------------|
| $[Cu-O]^+$                     | -0.4               |
| $[bis(\mu\text{-oxo})Cu]^{2+}$ | -0.55 <sup>a</sup> |
| $[Cu_3(\mu O_3)]^{2+}$         | -0.7 <sup>a</sup>  |
| $[Cu-OH]^+$                    | -1.4               |
| $[Cu-O-Cu]^{2+}$               | -0.8               |
| $[Cu_6O_7]^{2+}$               | -0.8 <sup>a</sup>  |

<sup>a</sup> averaged over all oxygen atoms of the motif

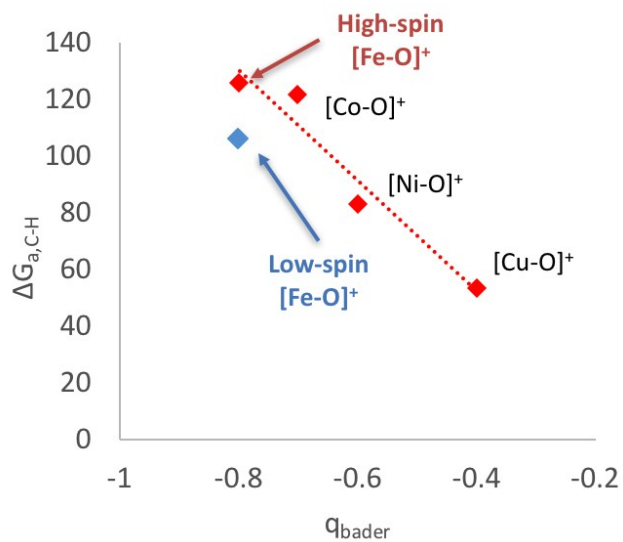

**Figure S3.** Correlation between the Bader charge on the active oxygen and the activation free energy ( $\Delta G_{\text{a,C-H}}$ ) for  $[\text{M-O}]^+$  motifs in CHA. As discussed above, the low-spin configuration of  $[\text{Fe-O}]^+$  is more favorable than the high-spin configuration.

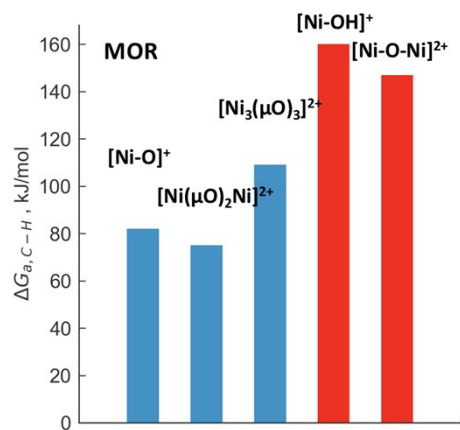

**Figure S4.** Activation free energy ( $\Delta G_{\text{a,C-H}}$ ) for various Ni motifs in MOR. The motifs with high (low) reactivity are shown in blue (red).

**Table S5** Free energy corrections (in kJ/mol) of transition states of different motifs at 423 K. Details for individual motifs are shown in Table S9. The equation  $\Delta G = \Delta E_{\text{DFT}} + \text{ZPE} + \Delta(C_p dT - TdS)$  is used calculating the free energies.

|                                                         | <b>Total Contributions<br/><math>\Delta G - \Delta E_{\text{DFT}}</math></b> |
|---------------------------------------------------------|------------------------------------------------------------------------------|
| [M-O] <sup>1+, 2+</sup>                                 | 34.8                                                                         |
| [M-OH] <sup>1+, 2+</sup>                                | 37.3                                                                         |
| [M-O-M] <sup>2+</sup>                                   | 35.5                                                                         |
| [M( $\mu$ O) <sub>2</sub> M] <sup>2+</sup>              | 25.4                                                                         |
| [M <sub>3</sub> ( $\mu$ O) <sub>3</sub> ] <sup>2+</sup> | 27.1                                                                         |
| [Cu <sub>6</sub> O <sub>7</sub> ] <sup>2+</sup>         | 36.6                                                                         |

**Table S6.** Free energy corrections (in kJ/mol) for calculating the formation energies of various motifs at 723 K. Details for individual motifs are shown in Table S9. The equation  $\Delta G = \Delta E_{\text{DFT}} + \text{ZPE} + \Delta(C_p dT - TdS)$  is used calculating the free energies.

|                                                         | <b>Total Contributions<br/><math>\Delta G - \Delta E_{\text{DFT}}</math></b> |
|---------------------------------------------------------|------------------------------------------------------------------------------|
| [M-O] <sup>1+, 2+</sup>                                 | 61.3                                                                         |
| [M-OH] <sup>1+, 2+</sup>                                | 86.0                                                                         |
| [M-O-M] <sup>2+</sup>                                   | 68.1                                                                         |
| [M( $\mu$ O) <sub>2</sub> M] <sup>2+</sup>              | 58.5                                                                         |
| [M <sub>3</sub> ( $\mu$ O) <sub>3</sub> ] <sup>2+</sup> | 63.2                                                                         |
| [Cu <sub>6</sub> O <sub>7</sub> ] <sup>2+</sup>         | 60.9                                                                         |

**Table S7.** Free energy corrections (in kJ/mol) for methanol and water adsorption at 523 K. Details of different motifs and cations are shown in Table S9. The equation  $\Delta G = \Delta E_{\text{DFT}} + \text{ZPE} + \Delta(C_p dT - TdS)$  is used calculating the free energies.

|          | <b>Total Contributions<br/><math>\Delta G - \Delta E_{\text{DFT}}</math></b> |
|----------|------------------------------------------------------------------------------|
| Methanol | 106.1                                                                        |
| Water    | 81.1                                                                         |

## CALCULATION OF METHANE ACTIVATION RATES

Using  $T = 423$  K, partial pressure of methane ( $P_{methane}$ ) = 1 bar and activation free energy of 115 kJ/mol, we use,

$$k_{C-H} = \frac{k_B T}{h} e^{-\frac{\Delta G_{a,C-H}}{k_B T}}$$

to get  $k_{C-H} = 0.055$  s<sup>-1</sup>. Assuming first order kinetics in methane, the rate of methane consumption ( $r_{methane}$ ) is given as:

$$r_{methane} = -k_{C-H} * P_{methane} * \theta, \text{ where } \theta \text{ is the coverage of active site motifs (say [M-O]}^+$$

species). Using standard first-order rate law analysis ( $t = -\frac{\ln[\theta_{final}]}{k}$ ) and assuming that the partial pressure of methane doesn't change, we predict ~ 1 min for 99% of the motifs to be reacted (forming [M-OH]<sup>+</sup> in the above example). Note that the chosen threshold  $\Delta G_{a,C-H}$  (115 kJ/mol) is close to the upper bound of experimentally measured activation energies (100 kJ/mol<sup>11</sup> and 142 kJ/mol<sup>13</sup>).

## CHOICE OF REFERENCE STATES

Cation-exchanged zeolites are typically synthesized by aqueous phase cation exchange with a Na- or a H- form of the parent material.<sup>7</sup> In this situation, the transition metal salt (say acetate, nitrate etc.) is used as the TM source, and metal oxide phases are not typically formed. Thus, we use the 'bare' cation exchanged form of the zeolite as a reference, rather than the TM oxide.<sup>8, 19</sup> This allows us to compare the 'stability' of a given motif for different cations, which is not possible if oxides were used as a reference (i.e. no way to compare CuO with Fe<sub>3</sub>O<sub>4</sub>, Co<sub>3</sub>O<sub>4</sub>, NiO etc.).

However, this also implies that the relative stability of different motifs can only be compared if the number of Al remains the same in the reference. Specifically, we used the following equations to calculate the formation energies of various motifs, where  $Z_1$  and  $Z_2$  represent the zeolite with one or two Al atoms, respectively.

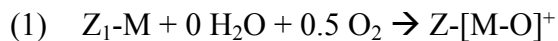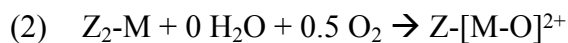

- (3)  $Z_1\text{-M} + 0.5 \text{H}_2\text{O} + 0.25 \text{O}_2 \rightarrow Z\text{-}[\text{M-OH}]^+$   
 (4)  $Z_2\text{-M} + 0.5 \text{H}_2\text{O} + 0.25 \text{O}_2 \rightarrow Z_2\text{-}[\text{M-OH}]^{2+}$   
 (5)  $Z_2\text{-2M} + 0 \text{H}_2\text{O} + 0.5 \text{O}_2 \rightarrow Z_2\text{-}[\text{M-O-M}]^{2+}$   
 (6)  $Z_2\text{-2M} + 0 \text{H}_2\text{O} + 1 \text{O}_2 \rightarrow Z_2\text{-}[\text{M-(}\mu\text{O)}_2\text{-M}]^{2+}$   
 (7)  $Z_2\text{-(M}_3\text{O}_2) + 0 \text{H}_2\text{O} + 0.5 \text{O}_2 \rightarrow Z_2\text{-}[\text{M}_3(\mu\text{O})_3]^{2+}$   
 (8)  $Z_2\text{-(M}_6\text{O}_6) + 0 \text{H}_2\text{O} + 0.5 \text{O}_2 \rightarrow Z_2\text{-}[\text{M}_6\text{O}_7]^{2+}$

Based on the above equations, the following sets of motifs can be compared directly (if the Al positions are also the same).

Set 1:  $[\text{M-O}]^+$ ,  $[\text{M-OH}]^+$

Set 2:  $[\text{M-O}]^{2+}$ ,  $[\text{M-OH}]^{2+}$ ,  $[\text{M-O-M}]^{2+}$ ,  $[\text{M-(}\mu\text{O)}_2\text{-M}]^{2+}$

Set3:  $[\text{M}_3(\mu\text{O})_2]^{2+}$

Set4:  $[\text{M}_6\text{O}_7]^{2+}$

Since the  $[\text{M}_3\text{O}_3]^{2+}$  and  $[\text{M}_6\text{O}_7]^{2+}$  motifs contain more cations than the number of Al atoms in the zeolite, additional BrønstedH form of the zeolites ( $Z_2\text{-2H}$ ) need to be included<sup>20</sup> to compare them with other  $Z_2/2\text{Al}$  systems as shown below.

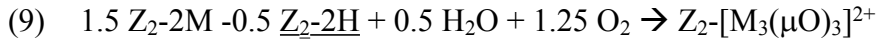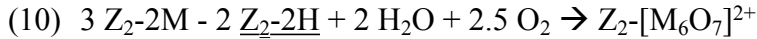

However, these equations now require different number of BronstedH for different cations and their most stable oxidation states (3 for  $\text{Fe}^{+3}$ , 2 for  $\text{Co}^{+2}$ , 1 for  $\text{Cu}^+$  etc), which prevents the comparison among different metals. Moreover, the results get skewed by the high formation energies of BronstedH and depend on ‘favorable’ Al positions for different cations (not shown). This complex, system-specific analysis is better suited for detailed studies focusing on a single TM cations. As the focus of this work is to rationalize overall trends, we chose to not include the ‘bare’ cation reference for the more complex motifs.

The equations #7 and #8 calculate the ‘binding energy’ of the active oxygen, which can be compared across different cations. This, in essence, is similar to the motivation of

We highlight that while the choice of the reference state for different motifs is somewhat arbitrary, the general conclusion that stability and activity are inversely correlated seems to hold over all the motifs and materials considered here.

equations #1 - #6, which are just the ‘binding energies’ of various active oxygen species.



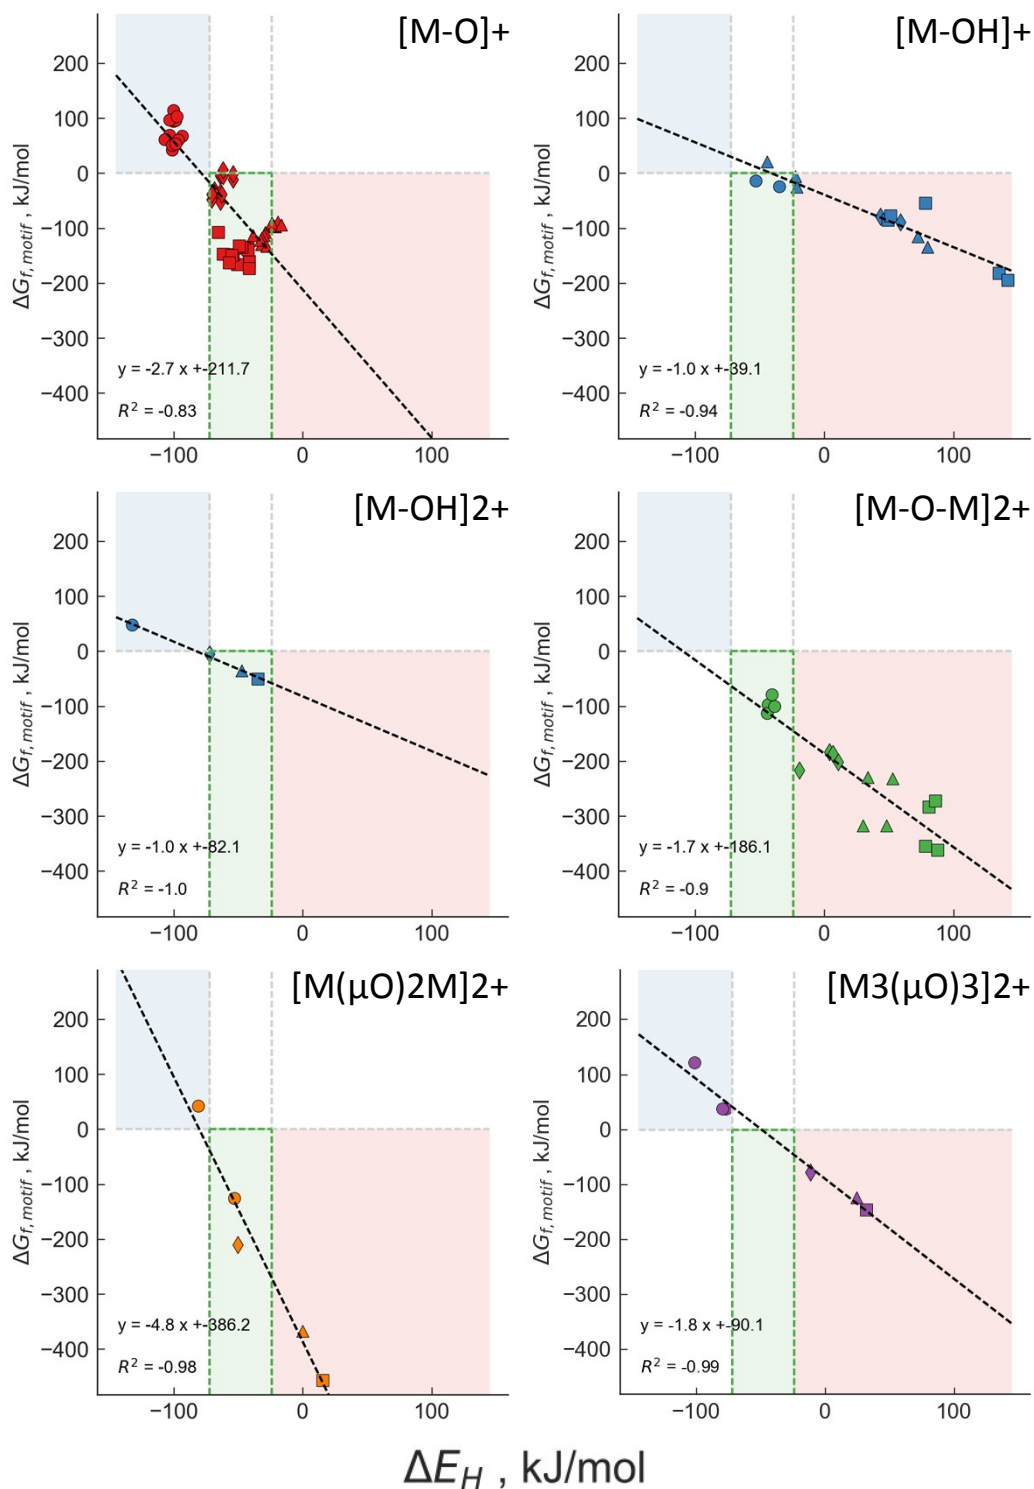

**Figure S5.** Relationship between formation free energies ( $\Delta G_f$ ) and hydrogen affinity ( $\Delta E_H$ ) for various motifs plotted separately. Although a clear correlation is seen for a given motif, the equations for different motifs are different because of definitions of the reference states.

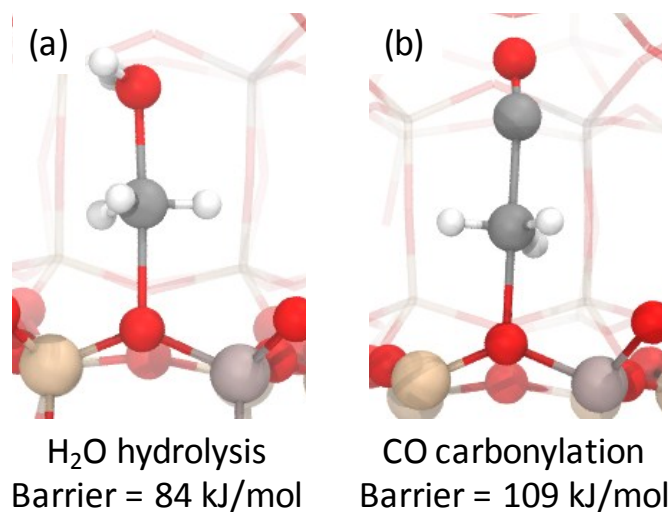

**Figure S6.** Transition states and free energy barriers for reaction of framework-bound methoxy group with (a) water and (b) CO. The reaction with water forms a protonated methanol that deprotonates to form a Brønsted H and the methanol product. When CO is included the extraction process, the acetyl intermediate is initially formed. This is further hydrolyzed with water to form acetic acid, as reported by Narsimhan et al.<sup>21</sup>

**Table S8.** Binding energies of methanol for [M-O-M]<sup>2+</sup> and [M<sub>3</sub>(μO)<sub>3</sub>]<sup>2+</sup> motifs in MOR.

| Motif                                              | Methanol binding Energy <sup>a</sup> |
|----------------------------------------------------|--------------------------------------|
| [Co-O-Co] <sup>2+</sup>                            | -129                                 |
| [Ni-O-Ni] <sup>2+</sup>                            | -94                                  |
| [Cu-O-Cu] <sup>2+</sup>                            | -100                                 |
| [Cu <sub>3</sub> (μO) <sub>3</sub> ] <sup>2+</sup> | -74, -100, -132 <sup>b</sup>         |

<sup>a</sup> desorption involves removal of the active oxygen as methanol based on the reaction: [M-CH<sub>3</sub>OH-M] → [M-\*M] + CH<sub>3</sub>OH, where \* represents the empty oxygen site.

<sup>b</sup> different binding sites

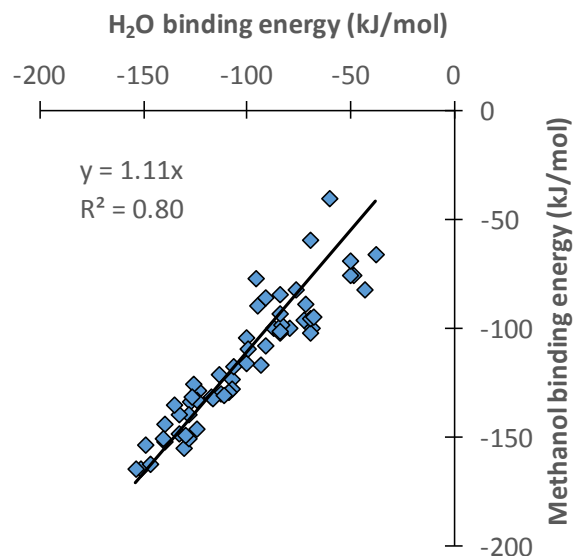

**Figure S7.** Linear relationship between the binding energy of water and methanol for different cations, topologies and binding sites. The intercept has been fixed at (0,0) during the linear regression. The figure shows the calculated DFT energies, without including entropic and finite temperature contributions.

### CALCULATION OF THEORETICAL CAPACITY

Consider a CHA zeolite with Si/Al = 11 and Cu/Al = 1, with the [Cu-OH]<sup>+</sup> as the active species. In this hypothetical example 100% of the Cu atoms exist at the active site. However, we have previously shown that this number is ~ 5 – 12% in a real CHA.<sup>22</sup> However, for the purposes of calculating the theoretical capacity, let us consider that only [Cu-OH]<sup>+</sup> species are allowed to be formed. For a 36-atom unit cell, the individual atoms we get the density as 799.5 g/uc, and for each [Cu-OH]<sup>+</sup> we get one methanol being formed. As shown below, this corresponds to 1,250 μmol/g-catalyst (or, equivalently 0.04 g-methanol/g-catalyst).

| Element | # of atoms | atomic mass             | total mass   |
|---------|------------|-------------------------|--------------|
| Si      | 11         | 28                      | 308          |
| Al      | 1          | 27                      | 27           |
| O       | 24         | 16                      | 384          |
| Cu      | 1          | 63.5                    | 63.5         |
| (OH)    | 1          | 17                      | 17           |
|         |            | <b>Total (g/mol-uc)</b> | <b>799.5</b> |

| <b>1 mol of methanol / uc of CHA</b> |                                             |
|--------------------------------------|---------------------------------------------|
| 1                                    | mol ch <sub>3</sub> oh per 799.5 g catalyst |
| 0.001250782                          | mol ch <sub>3</sub> oh per g cat            |
| 1250.781739                          | micro-mol-ch <sub>3</sub> oh/g cat          |
| 1.250781739                          | mmol/g cat                                  |
| 0.001250782                          | mol/g cat                                   |
| 0.040025016                          | g/ g cat                                    |
| <b>0.040025016</b>                   | <b>kg ch<sub>3</sub>oh/ kg cat</b>          |

**Table S9.** Total entropy contributions for individual motifs and cations for transition states (at 423 K), motif formation (At 723 K), methanol and water adsorption (at 523 K). The equation  $\Delta G = \Delta E_{\text{DFT}} + \text{ZPE} + \Delta(C_p dT - T dS)$  is used calculating the free energies.

The systems for which the corrections were not evaluated are denoted by n/a, and significant differences are not expected.

| <b>CHA</b><br><b>[M-O]<sup>+</sup>/6MR</b> | Total Contributions, $\Delta G - \Delta E_{\text{DFT}}$ (in eV) |                            |                                          |                                        |
|--------------------------------------------|-----------------------------------------------------------------|----------------------------|------------------------------------------|----------------------------------------|
|                                            | Transition state<br>(423 K)                                     | Motif formation<br>(723 K) | CH <sub>3</sub> OH adsorption<br>(523 K) | H <sub>2</sub> O adsorption<br>(523 K) |
| Fe                                         | 0.38                                                            | 0.62                       | 1.07                                     | 0.76                                   |
| Co                                         | 0.33                                                            | 0.65                       | 1.03                                     | 0.88                                   |
| Ni                                         | 0.38                                                            | 0.59                       | 1.06                                     | 0.90                                   |
| Cu                                         | 0.38                                                            | 0.61                       | 1.04                                     | 0.90                                   |

| <b>CHA</b><br><b>[M-O]<sup>+</sup>/8MR</b> | Total Contributions, $\Delta G - \Delta E_{\text{DFT}}$ (in eV) |                            |                                          |                                        |
|--------------------------------------------|-----------------------------------------------------------------|----------------------------|------------------------------------------|----------------------------------------|
|                                            | Transition state<br>(423 K)                                     | Motif formation<br>(723 K) | CH <sub>3</sub> OH adsorption<br>(523 K) | H <sub>2</sub> O adsorption<br>(523 K) |
| Fe                                         | 0.37                                                            | n/a                        | n/a                                      | n/a                                    |
| Co                                         | 0.29                                                            | 0.64                       | 1.03                                     | 0.87                                   |
| Ni                                         | 0.33                                                            | n/a                        | n/a                                      | n/a                                    |
| Cu                                         | 0.34                                                            | 0.70                       | 1.10                                     | 1.01                                   |

| <b>TON</b><br><b>[M-O]<sup>+</sup>/10MR</b> | Total Contributions, $\Delta G - \Delta E_{\text{DFT}}$ (in eV) |                            |                                          |                                        |
|---------------------------------------------|-----------------------------------------------------------------|----------------------------|------------------------------------------|----------------------------------------|
|                                             | Transition state<br>(423 K)                                     | Motif formation<br>(723 K) | CH <sub>3</sub> OH adsorption<br>(523 K) | H <sub>2</sub> O adsorption<br>(523 K) |
| Fe                                          | n/a                                                             | 0.67                       | n/a                                      | 0.67                                   |
| Co                                          | n/a                                                             | n/a                        | 0.98                                     | 0.77                                   |
| Ni                                          | 0.45                                                            | n/a                        | 1.09                                     | 0.76                                   |
| Cu                                          | 0.35                                                            | n/a                        | 1.07                                     | 0.87                                   |

| <b>FAU</b><br><b>[M-O]<sup>+</sup>/12MR</b> | Total Contributions, $\Delta G - \Delta E_{\text{DFT}}$ (in eV) |                            |                                          |                                        |
|---------------------------------------------|-----------------------------------------------------------------|----------------------------|------------------------------------------|----------------------------------------|
|                                             | Transition state<br>(423 K)                                     | Motif formation<br>(723 K) | CH <sub>3</sub> OH adsorption<br>(523 K) | H <sub>2</sub> O adsorption<br>(523 K) |
| Fe                                          | n/a                                                             | 0.60                       | 1.07                                     | n/a                                    |
| Co                                          | n/a                                                             | n/a                        | n/a                                      | n/a                                    |
| Ni                                          | n/a                                                             | n/a                        | 0.92                                     | n/a                                    |
| Cu                                          | n/a                                                             | n/a                        | n/a                                      | n/a                                    |
| <b>MOR</b><br><b>[M-O]<sup>+</sup>/12MR</b> | Total Contributions, $\Delta G - \Delta E_{\text{DFT}}$ (in eV) |                            |                                          |                                        |

|    | Transition state<br>(423 K) | Motif formation<br>(723 K) | CH <sub>3</sub> OH adsorption<br>(523 K) | H <sub>2</sub> O adsorption<br>(523 K) |
|----|-----------------------------|----------------------------|------------------------------------------|----------------------------------------|
| Fe | 0.36                        | 0.62                       | 0.99                                     | n/a                                    |
| Co | 0.35                        | 0.58                       | 1.06                                     | n/a                                    |
| Ni | 0.37                        | 0.63                       | 1.01                                     | n/a                                    |
| Cu | 0.37                        | 0.65                       | 1.01                                     | n/a                                    |

| <b>CHA</b><br>[M-OH] <sup>+</sup> /8MR | Total Contributions, $\Delta G - \Delta E_{\text{DFT}}$ (in eV) |                            |                                          |                                        |
|----------------------------------------|-----------------------------------------------------------------|----------------------------|------------------------------------------|----------------------------------------|
|                                        | Transition state<br>(423 K)                                     | Motif formation<br>(723 K) | CH <sub>3</sub> OH adsorption<br>(523 K) | H <sub>2</sub> O adsorption<br>(523 K) |
| Fe                                     | n/a                                                             | n/a                        | n/a                                      | n/a                                    |
| Co                                     | n/a                                                             | 0.85                       | n/a                                      | n/a                                    |
| Ni                                     | 0.40                                                            | n/a                        | n/a                                      | n/a                                    |
| Cu                                     | 0.37                                                            | 0.99                       | n/a                                      | n/a                                    |

| <b>MOR</b><br>[M-O-M] <sup>2+</sup> /8MR | Total Contributions, $\Delta G - \Delta E_{\text{DFT}}$ (in eV) |                            |                                          |                                        |
|------------------------------------------|-----------------------------------------------------------------|----------------------------|------------------------------------------|----------------------------------------|
|                                          | Transition state<br>(423 K)                                     | Motif formation<br>(723 K) | CH <sub>3</sub> OH adsorption<br>(523 K) | H <sub>2</sub> O adsorption<br>(523 K) |
| Fe                                       | 0.45                                                            | 0.68                       | n/a                                      | n/a                                    |
| Co                                       | 0.37                                                            | 0.72                       | n/a                                      | n/a                                    |
| Ni                                       | 0.36                                                            | 0.71                       | n/a                                      | n/a                                    |
| Cu                                       | 0.30                                                            | 0.71                       | n/a                                      | n/a                                    |

| <b>MOR</b><br>[M( $\mu$ O) <sub>2</sub> M] <sup>2+</sup> /8MR | Total Contributions, $\Delta G - \Delta E_{\text{DFT}}$ (in eV) |                            |                                          |                                        |
|---------------------------------------------------------------|-----------------------------------------------------------------|----------------------------|------------------------------------------|----------------------------------------|
|                                                               | Transition state<br>(423 K)                                     | Motif formation<br>(723 K) | CH <sub>3</sub> OH adsorption<br>(523 K) | H <sub>2</sub> O adsorption<br>(523 K) |
| Fe                                                            | n/a                                                             | n/a                        | n/a                                      | n/a                                    |
| Co                                                            | 0.22                                                            | n/a                        | n/a                                      | n/a                                    |
| Ni                                                            | 0.30                                                            | 0.61                       | n/a                                      | n/a                                    |
| Cu                                                            | 0.26                                                            | 0.61                       | n/a                                      | n/a                                    |

| <b>MOR</b><br>[M <sub>3</sub> O <sub>3</sub> ] <sup>2+</sup> /8MR | Total Contributions, $\Delta G - \Delta E_{\text{DFT}}$ (in eV) |                            |                                          |                                        |
|-------------------------------------------------------------------|-----------------------------------------------------------------|----------------------------|------------------------------------------|----------------------------------------|
|                                                                   | Transition state<br>(423 K)                                     | Motif formation<br>(723 K) | CH <sub>3</sub> OH adsorption<br>(523 K) | H <sub>2</sub> O adsorption<br>(523 K) |
| Fe                                                                | n/a                                                             | n/a                        | n/a                                      | n/a                                    |
| Co                                                                | n/a                                                             | n/a                        | n/a                                      | n/a                                    |
| Ni                                                                | 0.26                                                            | 0.67                       | n/a                                      | n/a                                    |
| Cu                                                                | 0.30                                                            | 0.63                       | n/a                                      | n/a                                    |

| MOR<br>[Cu <sub>3</sub> O <sub>7</sub> ] <sup>2+</sup> /8MR | Total Contributions, ΔG - ΔE <sub>DFT</sub> (in eV) |                            |                                          |                                        |
|-------------------------------------------------------------|-----------------------------------------------------|----------------------------|------------------------------------------|----------------------------------------|
|                                                             | Transition state<br>(423 K)                         | Motif formation<br>(723 K) | CH <sub>3</sub> OH adsorption<br>(523 K) | H <sub>2</sub> O adsorption<br>(523 K) |
| Cu                                                          | 0.38                                                | 0.63                       | 1.04                                     | n/a                                    |

## References

1. M. H. Groothaert, P. J. Smeets, B. F. Sels, P. A. Jacobs and R. A. Schoonheydt, *Journal of the American Chemical Society*, 2005, **127**, 1394-1395.
2. P. J. Smeets, M. H. Groothaert and R. A. Schoonheydt, *Catalysis Today*, 2005, **110**, 303-309.
3. J. S. Woertink, P. J. Smeets, M. H. Groothaert, M. A. Vance, B. F. Sels, R. A. Schoonheydt and E. I. Solomon, *Proc. Natl. Acad. Sci.*, 2009, **106**, 18908-18913.
4. N. V. Beznis, B. M. Weckhuysen and J. H. Bitter, *Catalysis Letters*, 2010, **138**, 14-22.
5. E. M. Alayon, M. Nachtegaal, M. Ranocchiari and J. A. van Bokhoven, *Chemical Communications*, 2012, **48**, 404-406.
6. T. Sheppard, C. D. Hamill, A. Goguet, D. W. Rooney and J. M. Thompson, *Chemical Communications*, 2014, **50**, 11053-11055.
7. M. J. Wulfers, S. Teketel, B. Ipek and R. F. Lobo, *Chemical Communications*, 2015, **51**, 4447-4450.
8. S. Grundner, M. A. C. Markovits, G. Li, M. Tromp, E. A. Pidko, E. J. M. Hensen, A. Jentys, M. Sanchez-Sanchez and J. A. Lercher, *Nat. Commun.*, 2015, **6**.
9. S. E. Bozbag, E. M. C. Alayon, J. Pechacek, M. Nachtegaal, M. Ranocchiari and J. A. van Bokhoven, *Catalysis Science & Technology*, 2016, **6**, 5011-5022.
10. P. Tomkins, A. Mansouri, S. E. Bozbag, F. Krumeich, M. B. Park, E. M. C. Alayon, M. Ranocchiari and J. A. van Bokhoven, *Angewandte Chemie*, 2016, **128**, 5557-5561.
11. K. Narsimhan, K. Iyoki, K. Dinh and Y. Román-Leshkov, *ACS Central Science*, 2016, **2**, 424-429.
12. M. A. C. Markovits, A. Jentys, M. Tromp, M. Sanchez-Sanchez and J. A. Lercher, *Top Catal*, 2016, **59**, 1554-1563.
13. B. Ipek and R. F. Lobo, *Chemical Communications*, 2016, **52**, 13401-13404.
14. S. Grundner, W. Luo, M. Sanchez-Sanchez and J. A. Lercher, *Chemical Communications*, 2016, **52**, 2553-2556.
15. H. V. Le, S. Parishan, A. Sagaltchik, C. Göbel, C. Schlesiger, W. Malzer, A. Trunschke, R. Schomäcker and A. Thomas, *ACS Catal.*, 2017, **7**, 1403-1412.
16. Y. Kim, T. Y. Kim, H. Lee and J. Yi, *Chemical Communications*, 2017, DOI: 10.1039/C7CC00467B.
17. V. L. Sushkevich, D. Palagin, M. Ranocchiari and J. A. van Bokhoven, *Science*, 2017, **356**, 523.

18. D. K. Pappas, E. Borfecchia, M. Dybala, I. Pankin, K. A. Lomachenko, A. Martini, M. Signorile, S. Teketel, B. Arstad and G. Berlier, *Journal of the American Chemical Society*, 2017.
19. G. Li, P. Vassilev, M. Sanchez-Sanchez, J. A. Lercher, E. J. Hensen and E. A. Pidko, *Journal of Catalysis*, 2016, **338**, 305-312.
20. B. Ipek, M. J. Wulfers, H. Kim, F. Göttl, I. Hermans, J. P. Smith, K. S. Booksh, C. M. Brown and R. F. Lobo, *ACS Catal.*, 2017, **7**, 4291-4303.
21. K. Narsimhan, V. K. Michaelis, G. Mathies, W. R. Gunther, R. G. Griffin and Y. Román-Leshkov, *Journal of the American Chemical Society*, 2015, **137**, 1825-1832.
22. A. R. Kulkarni, Z.-J. Zhao, S. Siahrostami, J. K. Nørskov and F. Studt, *ACS Catal.*, 2016, **6**, 6531-6536.
